# Supplementary material for: Three novel zinc(ii) metal–organic frameworks based on three tetrazolate ligands: synthesis, structures and photoluminescence
Source: Royal Society of Chemistry journal article supplement (doi:10.1039/c4ra02872d), 2014-01-01
Supplement: c4ra02872d1.pdf [file c4ra02872d1.pdf]

## Supporting Information

### Three novel zinc(II) metal-organic frameworks based on three tetrazolate ligands: synthesis, structures and photoluminescence

Hongming He,<sup>a</sup> Fuxing Sun,<sup>\*a</sup> Nian Zhao,<sup>a</sup> Rongrong Yuan<sup>a</sup> and Guangshan Zhu<sup>a,b</sup>

<sup>a</sup>State Key Laboratory of Inorganic Synthesis and Preparative Chemistry, Jilin University, Changchun, 130012, P. R. China.

Fax: +86-431-85168331; Tel: +86-431-85168887; E-mail: zhugs@jlu.edu.cn.

<sup>b</sup>Queensland Micro- and Nanotechnology Centre, Griffith University, Queensland 4111, Australia.

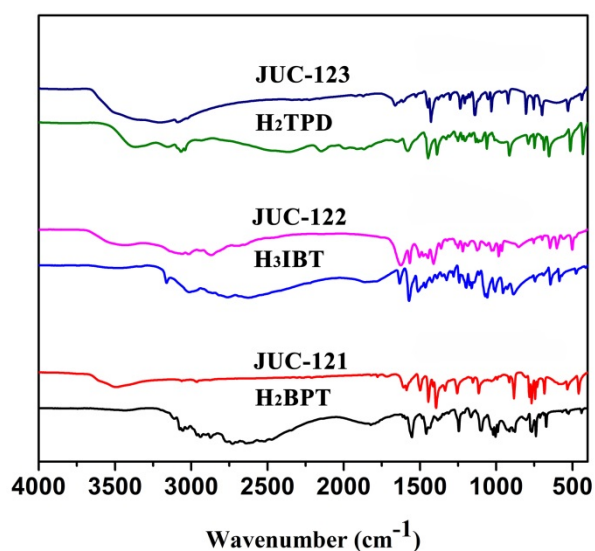

Fig. S1 The FT-IR spectra of the free ligands, JUC-121, JUC-122 and JUC-123.

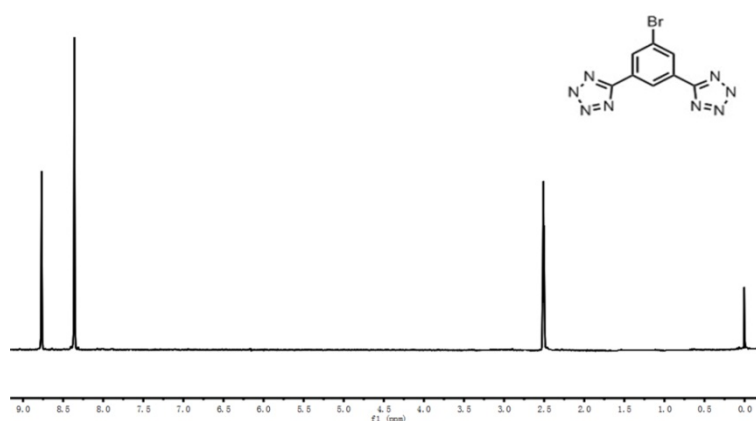

Fig. S2 The <sup>1</sup>H NMR spectra of H<sub>2</sub>BPT.

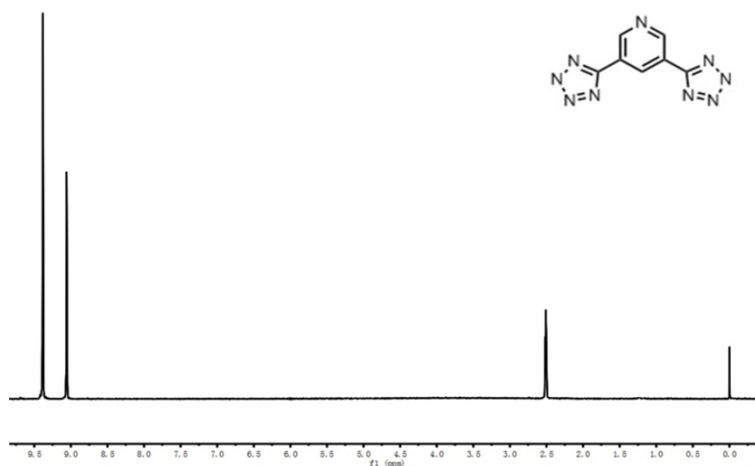

**Fig. S3** The  $^1\text{H}$  NMR spectra of  $\text{H}_2\text{TPD}$ .

**Table S1** Selected bond lengths ( $\text{\AA}$ ) and angles (deg) for JUC-121, JUC-122 and JUC-123

| JUC-121             |            |                     |            |
|---------------------|------------|---------------------|------------|
| Zn(1)-N(3)          | 2.131(3)   | Zn(1)-N(3)#1        | 2.131(3)   |
| Zn(1)-N(3)#2        | 2.131(3)   | Zn(1)-N(3)#3        | 2.131(3)   |
| Zn(1)-O(1)#2        | 2.138(3)   | Zn(1)-O(1)          | 2.138(3)   |
| Zn(2)-N(1)#4        | 2.016(3)   | Zn(2)-N(1)#5        | 2.016(3)   |
| Zn(2)-N(1)#6        | 2.016(3)   | Zn(2)-N(1)          | 2.016(3)   |
| N(3)-Zn(1)-N(3)#1   | 84.58(15)  | N(3)-Zn(1)-N(3)#2   | 180.0      |
| N(3)#1-Zn(1)-N(3)#2 | 95.42(15)  | N(3)-Zn(1)-N(3)#3   | 95.42(15)  |
| N(3)#1-Zn(1)-N(3)#3 | 180.0      | N(3)#2-Zn(1)-N(3)#3 | 84.58(15)  |
| N(3)-Zn(1)-O(1)#2   | 91.85(10)  | N(3)#1-Zn(1)-O(1)#2 | 88.15(10)  |
| N(3)#2-Zn(1)-O(1)#2 | 88.15(10)  | N(3)#3-Zn(1)-O(1)#2 | 91.85(10)  |
| N(3)-Zn(1)-O(1)     | 88.15(10)  | N(3)#1-Zn(1)-O(1)   | 91.85(10)  |
| N(3)#2-Zn(1)-O(1)   | 91.85(10)  | N(3)#3-Zn(1)-O(1)   | 88.15(10)  |
| O(1)#2-Zn(1)-O(1)   | 180.00(11) | N(1)#4-Zn(2)-N(1)#5 | 110.63(7)  |
| N(1)#4-Zn(2)-N(1)#6 | 110.63(8)  | N(1)#5-Zn(2)-N(1)#6 | 107.18(15) |
| N(1)#4-Zn(2)-N(1)   | 107.18(15) | N(1)#5-Zn(2)-N(1)   | 110.63(8)  |
| N(1)#6-Zn(2)-N(1)   | 110.63(7)  |                     |            |

Symmetry transformations used to generate equivalent atoms:

#1  $y+1/2, x-1/2, -z+2$ ; #2  $-x+1, -y, -z+2$ ; #3  $-y+1/2, -x+1/2, z$ ; #4  $-x+3/2, -y+1/2, z$ ; #5  $-y+1, x-1/2, -z+3/2$ ; #6  $+1/2, -x+1, -z+3/2$ ; #7  $y, x, z$ .

---

**JUC-122**

---

|                      |            |                     |            |
|----------------------|------------|---------------------|------------|
| N(1)-Zn(1)           | 2.162(3)   | N(4)-Zn(2)          | 1.983(3)   |
| N(5)-Zn(1)           | 2.162(3)   | N(10)-Zn(2)         | 1.988(3)   |
| Zn(1)-N(1)#1         | 2.162(3)   | Zn(1)-N(1)#2        | 2.162(3)   |
| Zn(1)-N(5)#2         | 2.162(3)   | Zn(1)-N(5)#1        | 2.163(3)   |
| Zn(2)-N(4)#3         | 1.982(3)   | Zn(2)-N(10)#3       | 1.988(3)   |
| N(1)#1-Zn(1)-N(1)#2  | 98.01(9)   | N(1)#1-Zn(1)-N(1)   | 98.00(9)   |
| N(1)#2-Zn(1)-N(1)    | 98.00(9)   | N(1)#1-Zn(1)-N(5)#2 | 93.99(11)  |
| N(1)#2-Zn(1)-N(5)#2  | 76.42(10)  | N(1)-Zn(1)-N(5)#2   | 167.40(10) |
| N(1)#1-Zn(1)-N(5)    | 167.40(10) | N(1)#2-Zn(1)-N(5)   | 93.99(11)  |
| N(1)-Zn(1)-N(5)      | 76.42(10)  | N(5)#2-Zn(1)-N(5)   | 92.55(10)  |
| N(1)#1-Zn(1)-N(5)#1  | 76.42(10)  | N(1)#2-Zn(1)-N(5)#1 | 167.40(10) |
| N(1)-Zn(1)-N(5)#1    | 93.99(11)  | N(5)#2-Zn(1)-N(5)#1 | 92.55(10)  |
| N(5)-Zn(1)-N(5)#1    | 92.55(10)  | N(4)#3-Zn(2)-N(4)   | 114.59(17) |
| N(4)#3-Zn(2)-N(10)   | 112.30(13) | N(4)-Zn(2)-N(10)    | 103.55(11) |
| N(4)#3-Zn(2)-N(10)#3 | 103.55(11) | N(4)-Zn(2)-N(10)#3  | 112.30(13) |
| N(10)-Zn(2)-N(10)#3  | 110.8(2)   |                     |            |

Symmetry transformations used to generate equivalent atoms:

#1 -y,x-y,z; #2 -x+y,-x,z; #3 x-y+1/3,-y+2/3,-z+1/6.

---

**JUC-123**

---

|                 |            |                 |            |
|-----------------|------------|-----------------|------------|
| N(2)-Zn(1)      | 2.028(3)   | N(5)-Zn(1)      | 2.059(3)   |
| N(7)-Zn(1)      | 2.002(3)   | O(1)-Zn(1)      | 2.149(3)   |
| O(2)-Zn(1)      | 2.154(3)   |                 |            |
| N(7)-Zn(1)-N(2) | 131.05(11) | N(7)-Zn(1)-N(5) | 114.25(11) |
| N(2)-Zn(1)-N(5) | 114.68(10) | N(7)-Zn(1)-O(1) | 91.41(11)  |
| N(2)-Zn(1)-O(1) | 88.17(11)  | N(5)-Zn(1)-O(1) | 91.99(11)  |
| N(7)-Zn(1)-O(2) | 91.00(12)  | N(2)-Zn(1)-O(2) | 88.98(11)  |
| N(5)-Zn(1)-O(2) | 88.55(11)  | O(1)-Zn(1)-O(2) | 177.06(10) |

---
